# Supplementary material for: Silica coated magnetic NiFe2O4 nanoparticle supported phosphomolybdic acid; synthesis, preparation and its application as a heterogeneous and recyclable catalyst for the one-pot synthesis of tri- and tetra-substituted imidazoles under solvent free conditions
Source: Royal Society of Chemistry journal article supplement (doi:10.1039/c5ra10534j), 2015-01-01
Supplement: c5ra10534j1.pdf [file c5ra10534j1.pdf]

## Supplementary Information

**Silica coated magnetic NiFe<sub>2</sub>O<sub>4</sub> nanoparticles supported phosphomolybdic acid; synthesis, preparation and its application as a heterogeneous and recyclable catalyst for the one-pot synthesis of tri and tetra-substituted imidazoles under solvent free conditions**

**Behrooz Maleki<sup>\*a</sup>, Hossein Eshghi<sup>b</sup>, Amir Khojastehnezhad<sup>b</sup>, Reza Tayebee<sup>a</sup>, Samaneh Sedigh Ashrafi<sup>a</sup>, Golnoosh Esmailian Kahoo<sup>a</sup>, Farid Moeinpour<sup>c</sup>**

*\*Correspondence to: Department of Chemistry, Hakim Sabzevari University, Sabzevar, 96179-76487, Iran; \*E-mail:b.maleki@hsu.ac.ir, Tel: +98-44013324 Fax: +98-514401300*

*<sup>a</sup>Department of Chemistry, Hakim Sabzevari University, Sabzevar, 96179-76487, Iran*

*<sup>b</sup>Department of Chemistry, Faculty of Sciences, Ferdowsi University of Mashhad, Mashhad, Iran*

*<sup>c</sup>Department of Chemistry, Bandar Abbas Branch, Islamic Azad University, Bandar Abbas 7915893144, Iran*

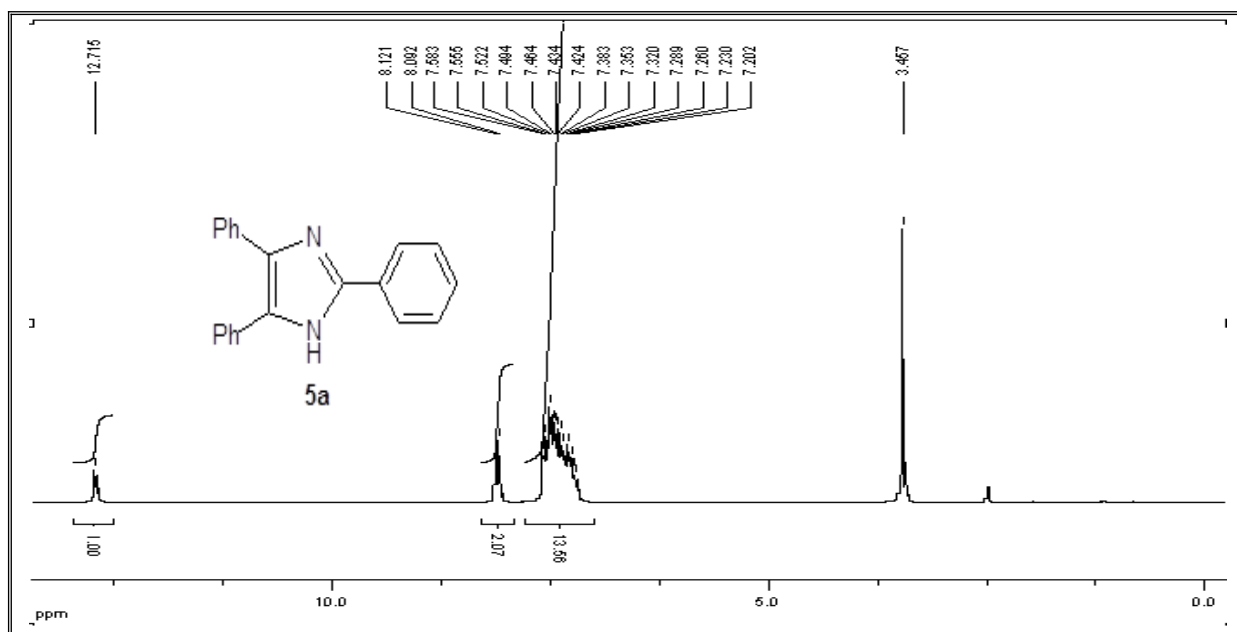

**Fig. S1.** <sup>1</sup>H NMR (DMSO-d<sub>6</sub>, 250 MHz) of **5a**

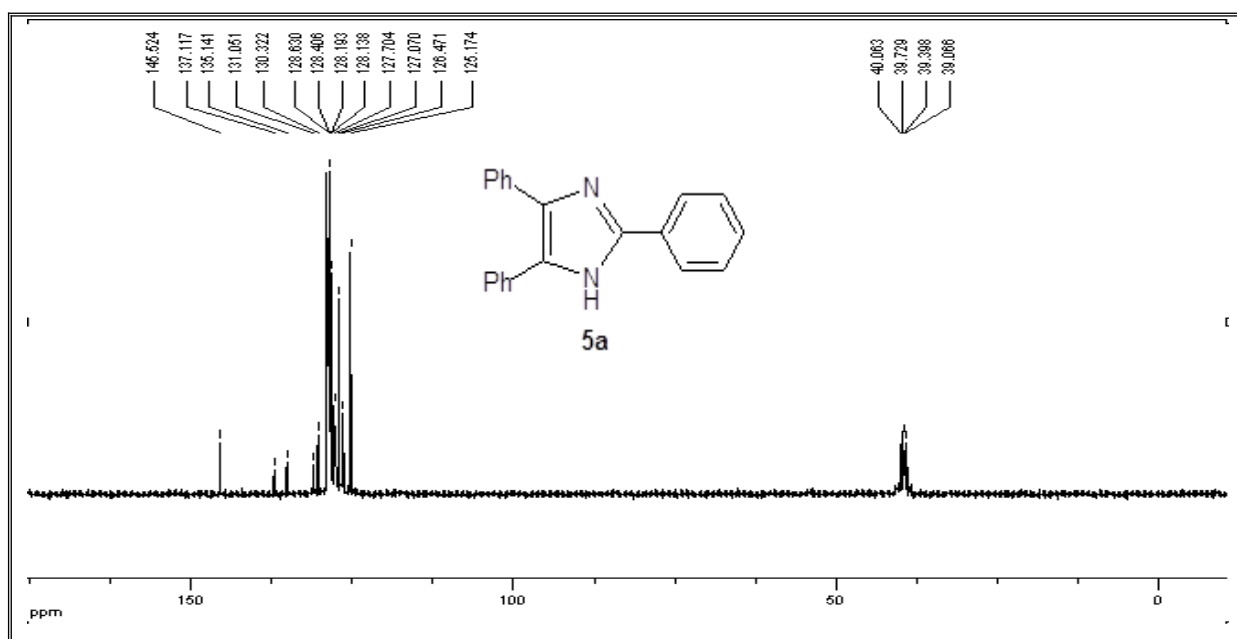

**Fig. S2.** <sup>13</sup>C NMR (DMSO-d<sub>6</sub>, 70 MHz) of **5a**

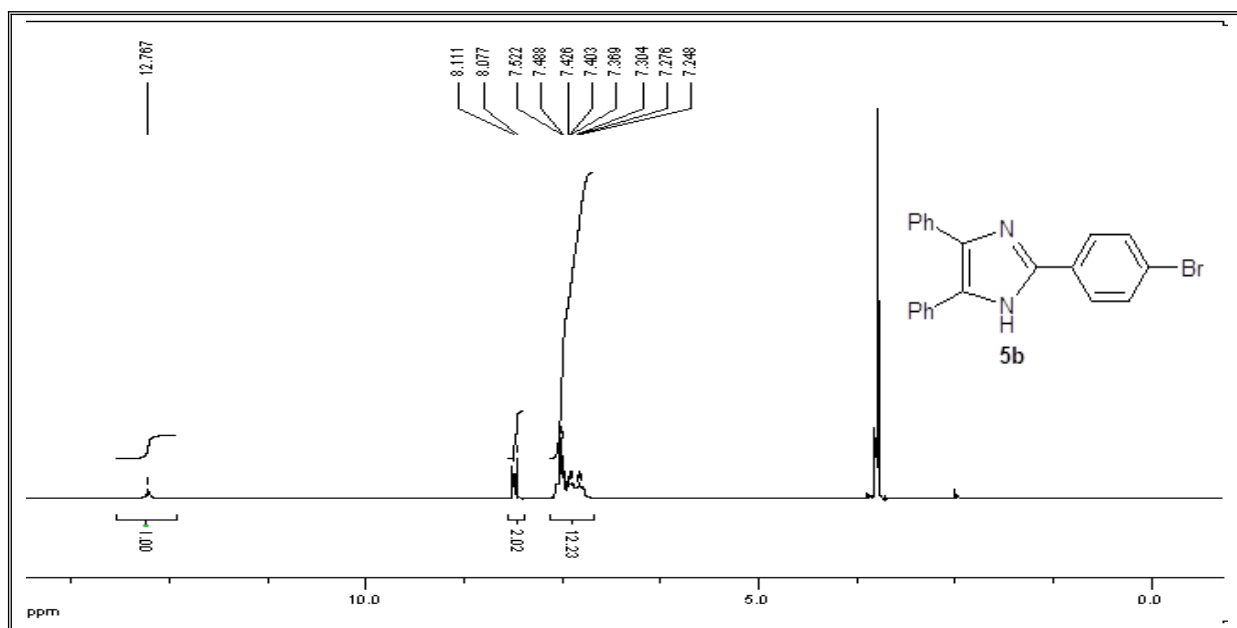

**Fig. S3.**  $^1\text{H}$ NMR (DMSO- $d_6$ , 250 MHz) of **5b**

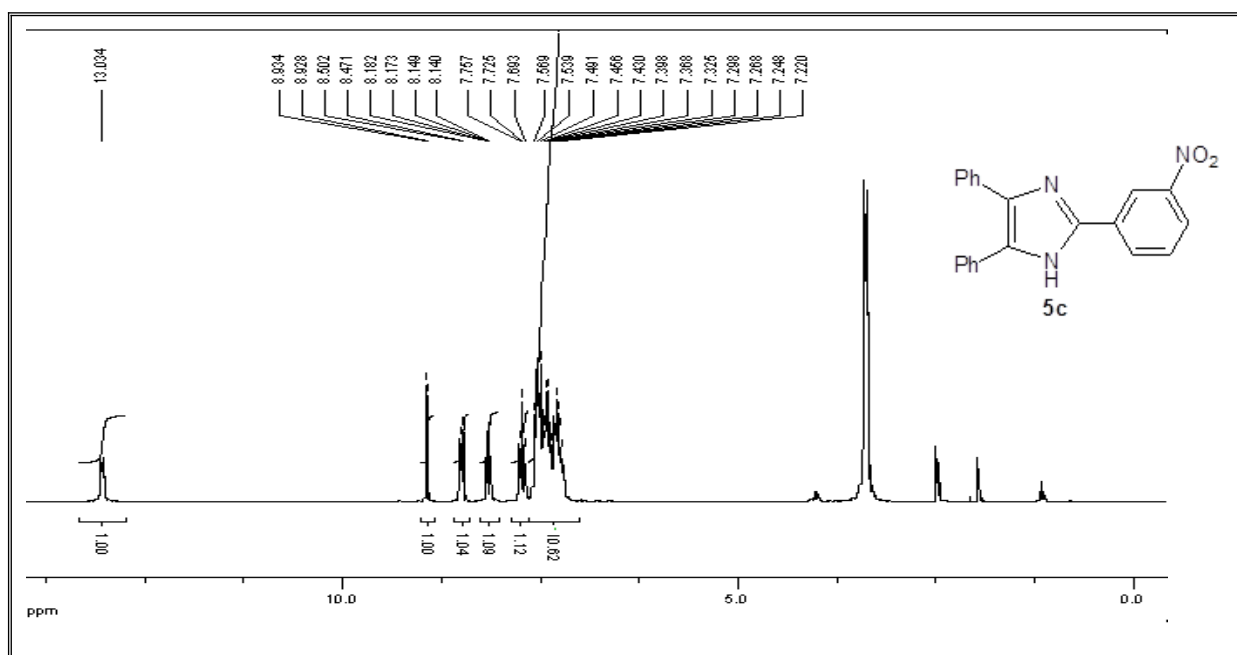

**Fig. S4.**  $^1\text{H}$ NMR (DMSO- $d_6$ , 250 MHz) of **5c**

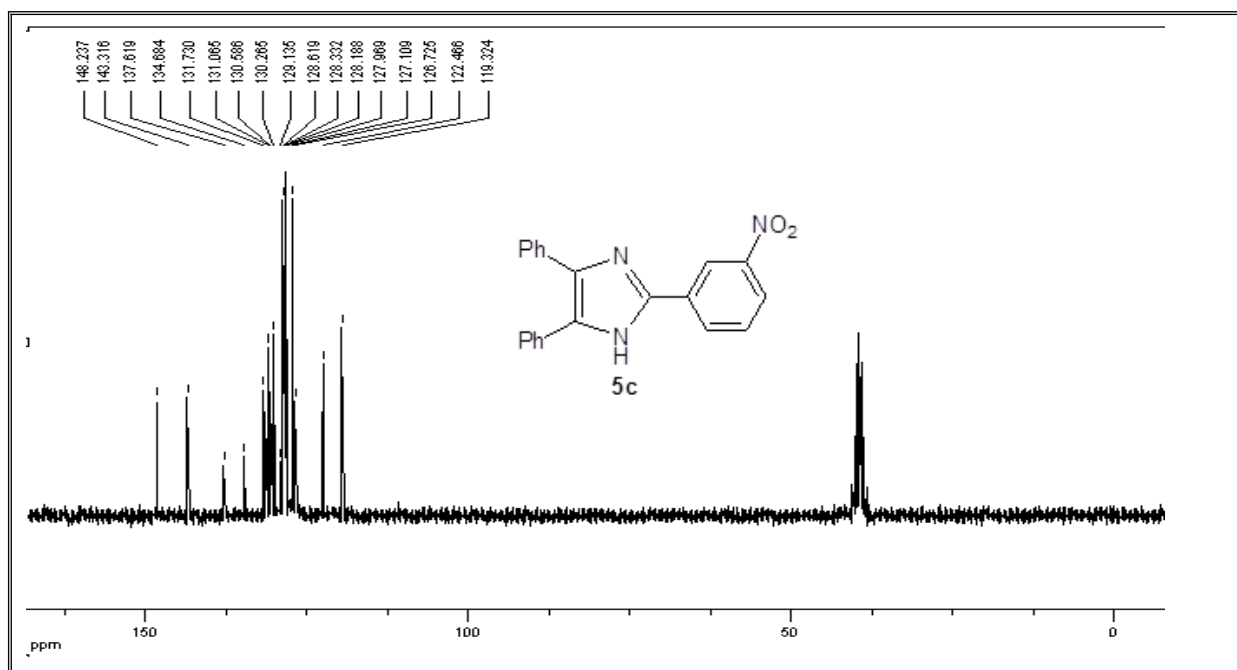

**Fig. S5.** <sup>13</sup>CNMR (DMSO-d<sub>6</sub>, 70 MHz) of **5c**

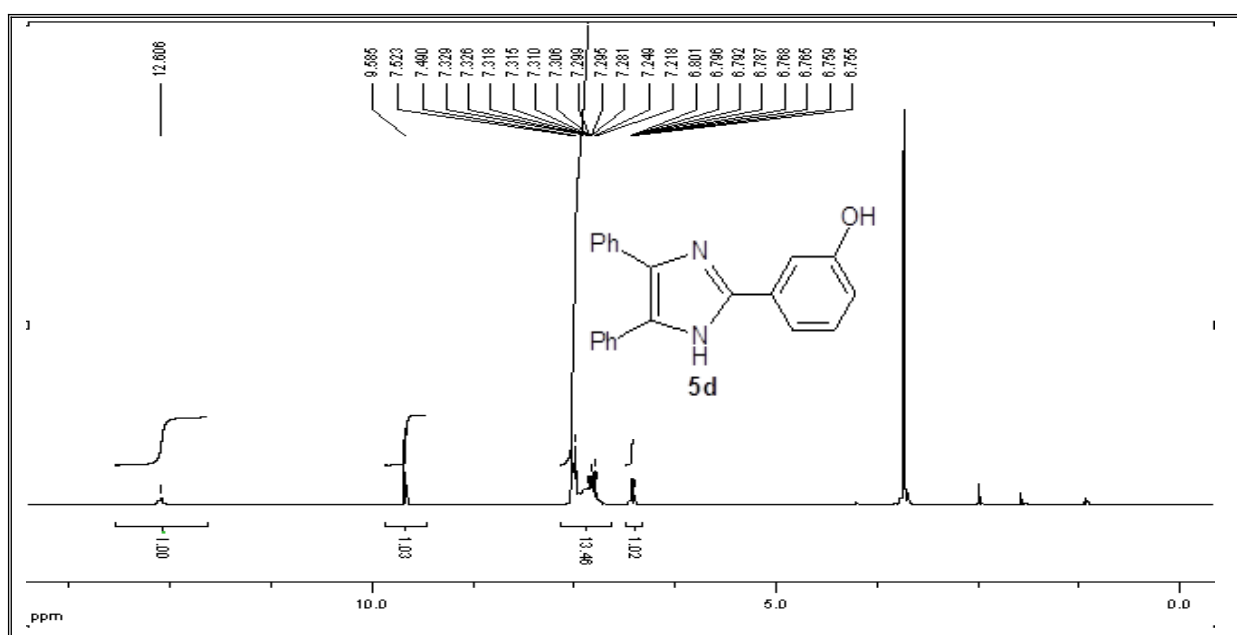

**Fig. S6.** <sup>1</sup>H NMR (DMSO-d<sub>6</sub>, 250 MHz) of **5d**

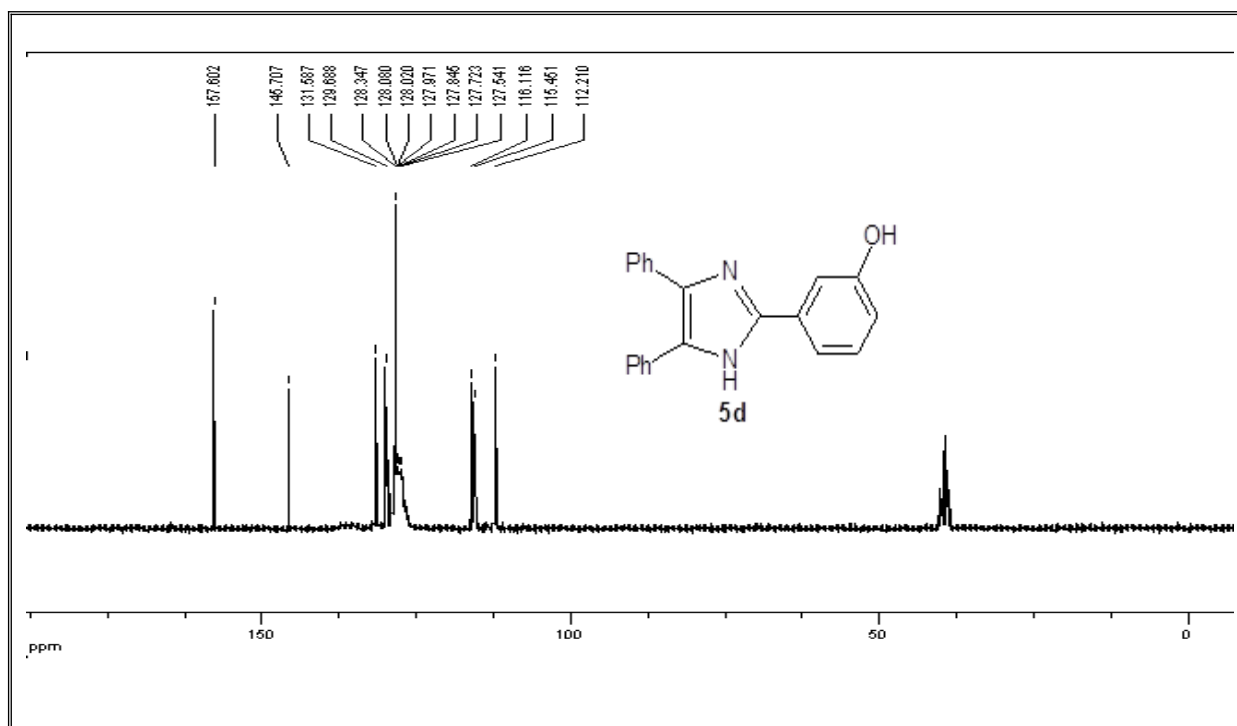

**Fig. S7.** <sup>13</sup>CNMR (DMSO-d<sub>6</sub>, 70 MHz) of **5d**

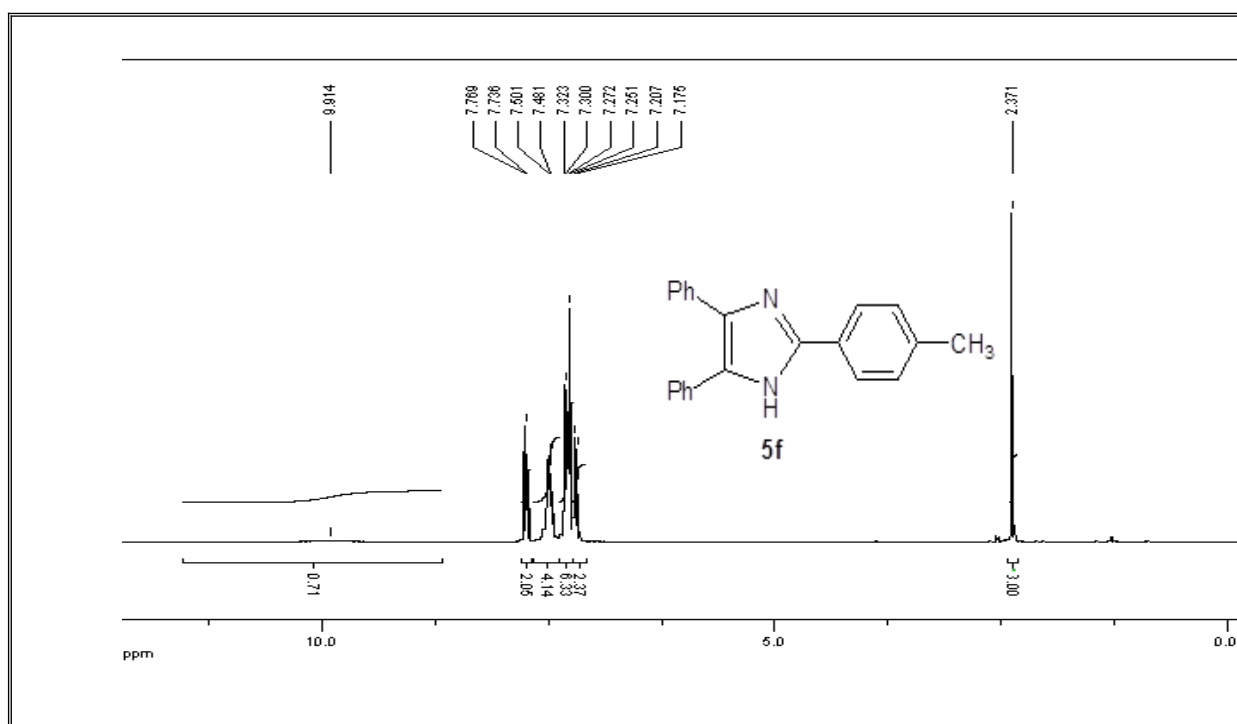

**Fig. S8.** <sup>1</sup>HNMR (CDCl<sub>3</sub>, 250 MHz) of **5f**

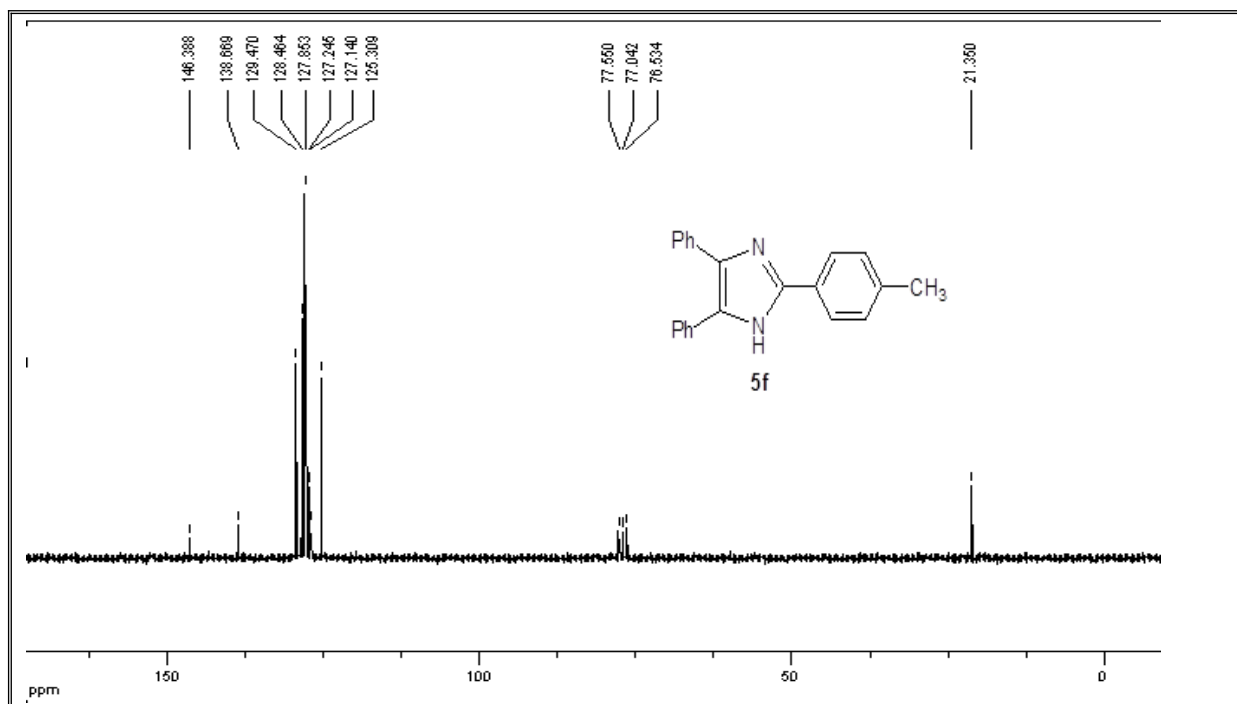

**Fig. S9.** <sup>13</sup>CNMR (CDCl<sub>3</sub>, 70 MHz) of **5f**

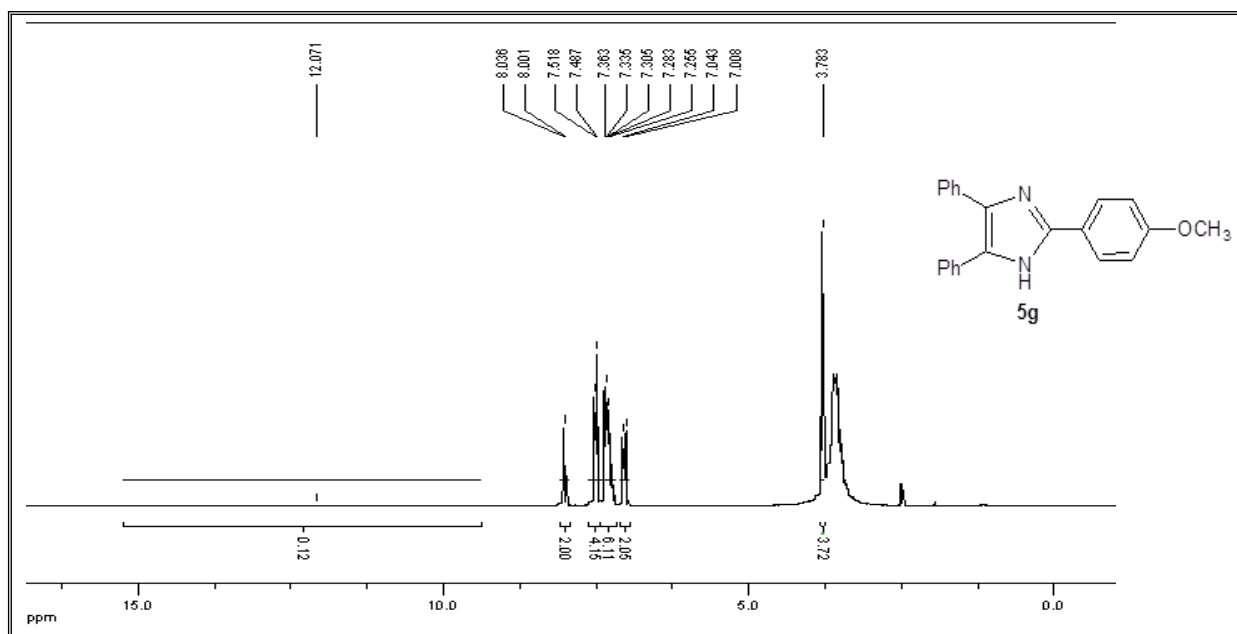

**Fig. S10.** <sup>1</sup>HNMR (DMSO-d<sub>6</sub>, 250 MHz) of **5g**

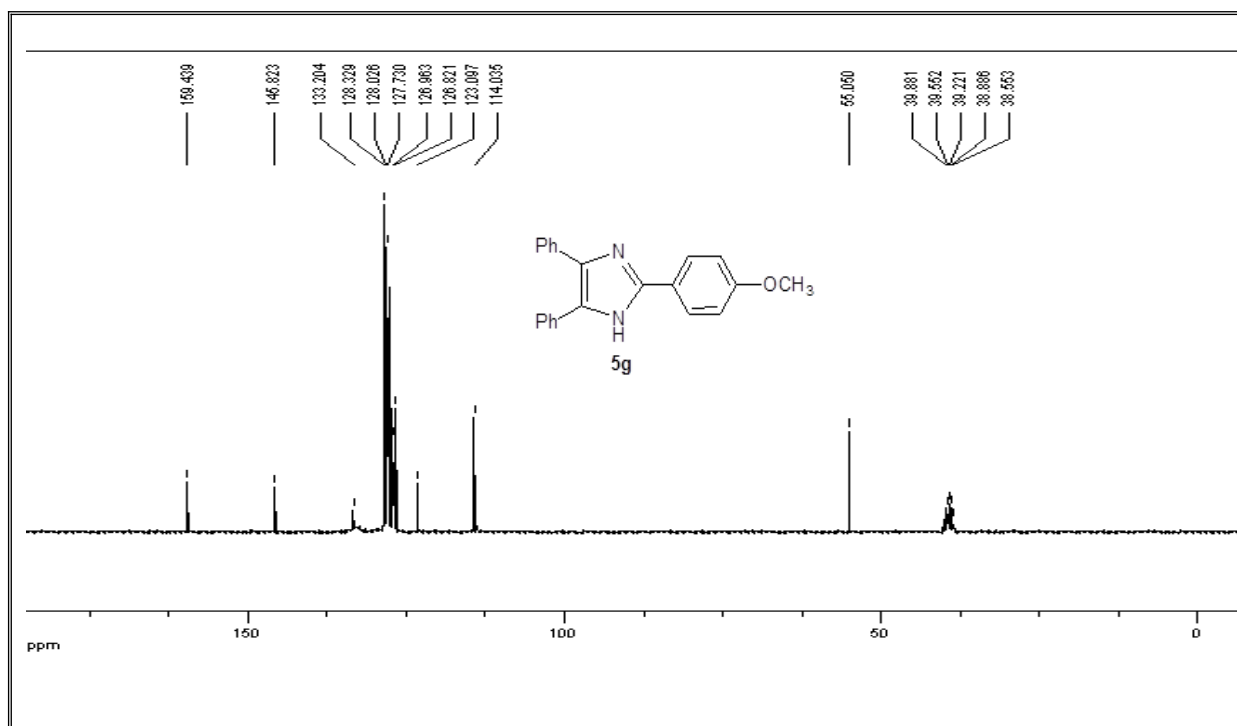

**Fig. S11.** <sup>13</sup>CNMR (DMSO-d<sub>6</sub>, 70 MHz) of **5g**

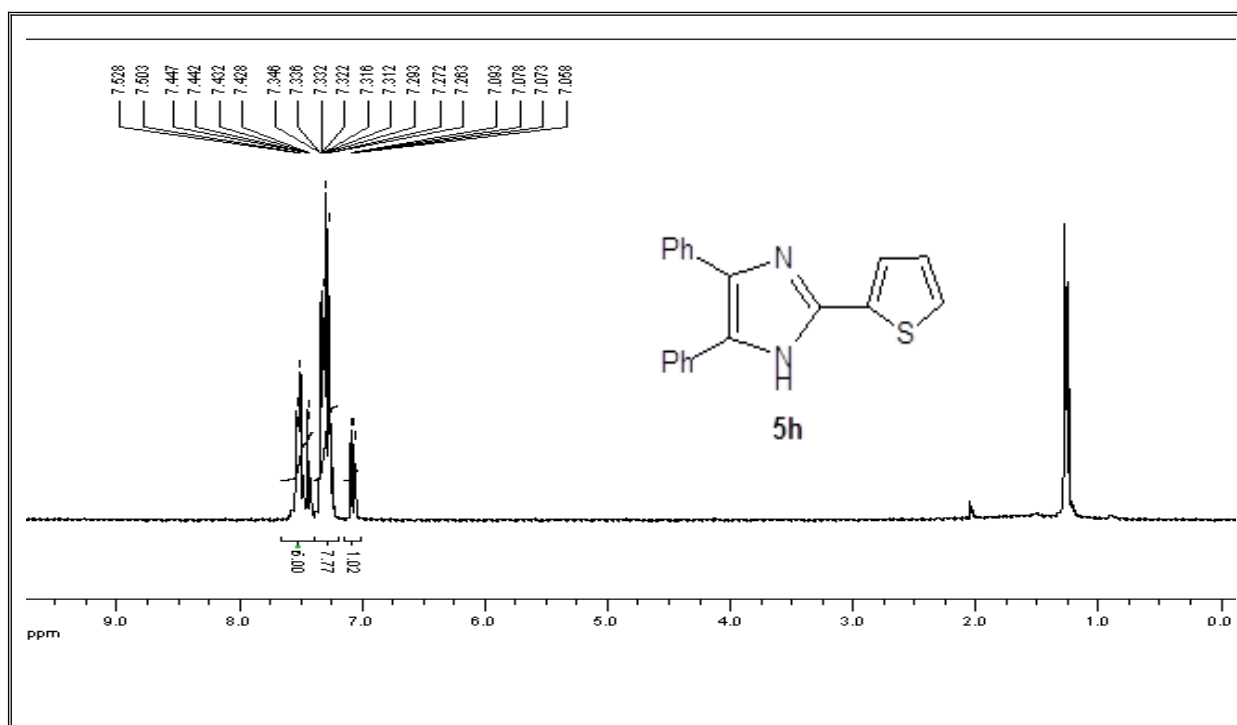

**Fig. S12.** <sup>1</sup>HNMR (DMSO-d<sub>6</sub>, 250 MHz) of **5h**

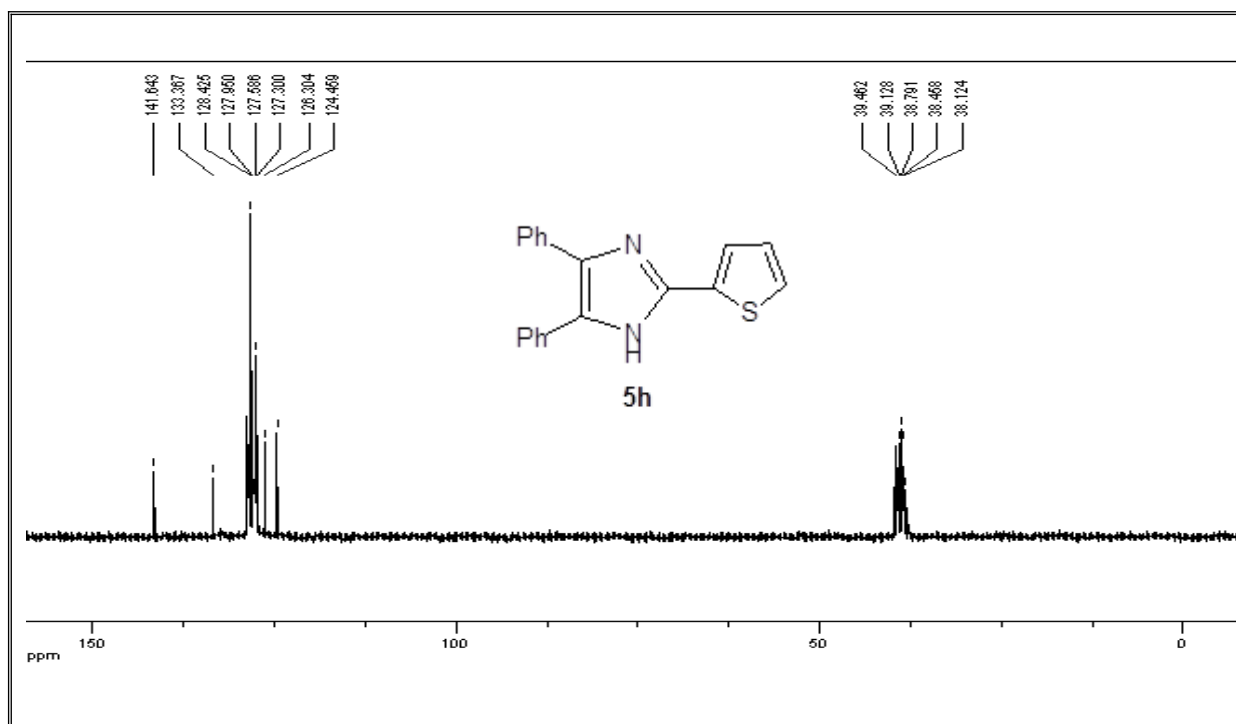

**Fig. S13.** <sup>13</sup>CNMR (DMSO-d<sub>6</sub>, 70 MHz) of **5h**

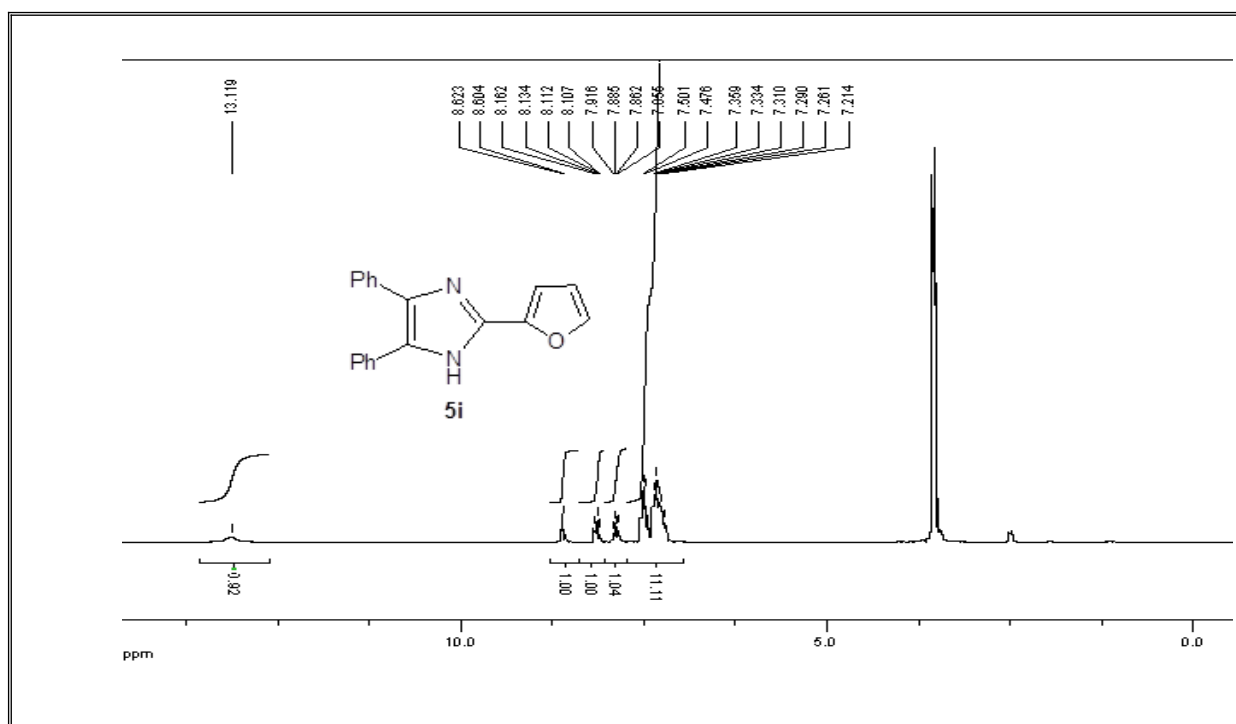

**Fig. S14.** <sup>1</sup>HNMR (DMSO-d<sub>6</sub>, 250 MHz) of **5i**



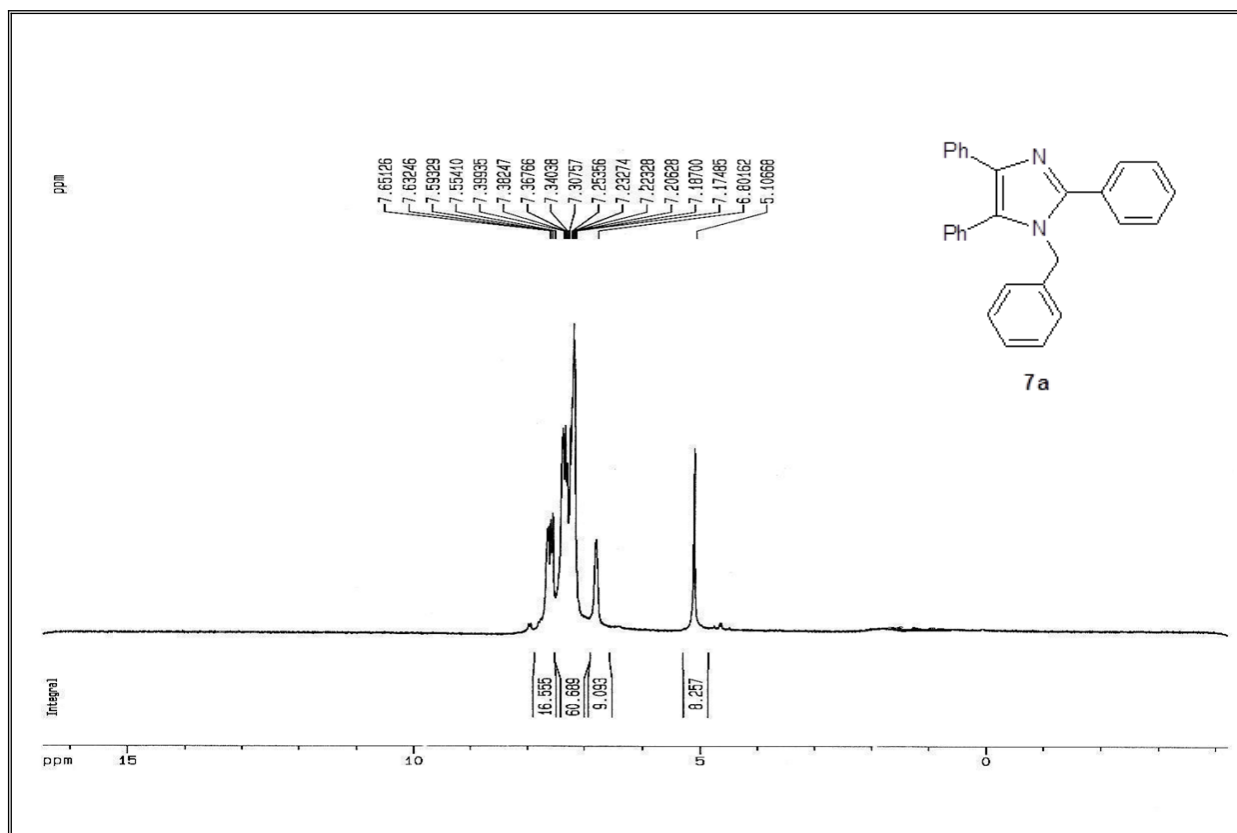

Fig. S15. <sup>1</sup>H NMR (CDCl<sub>3</sub>, 300 MHz) of 7a

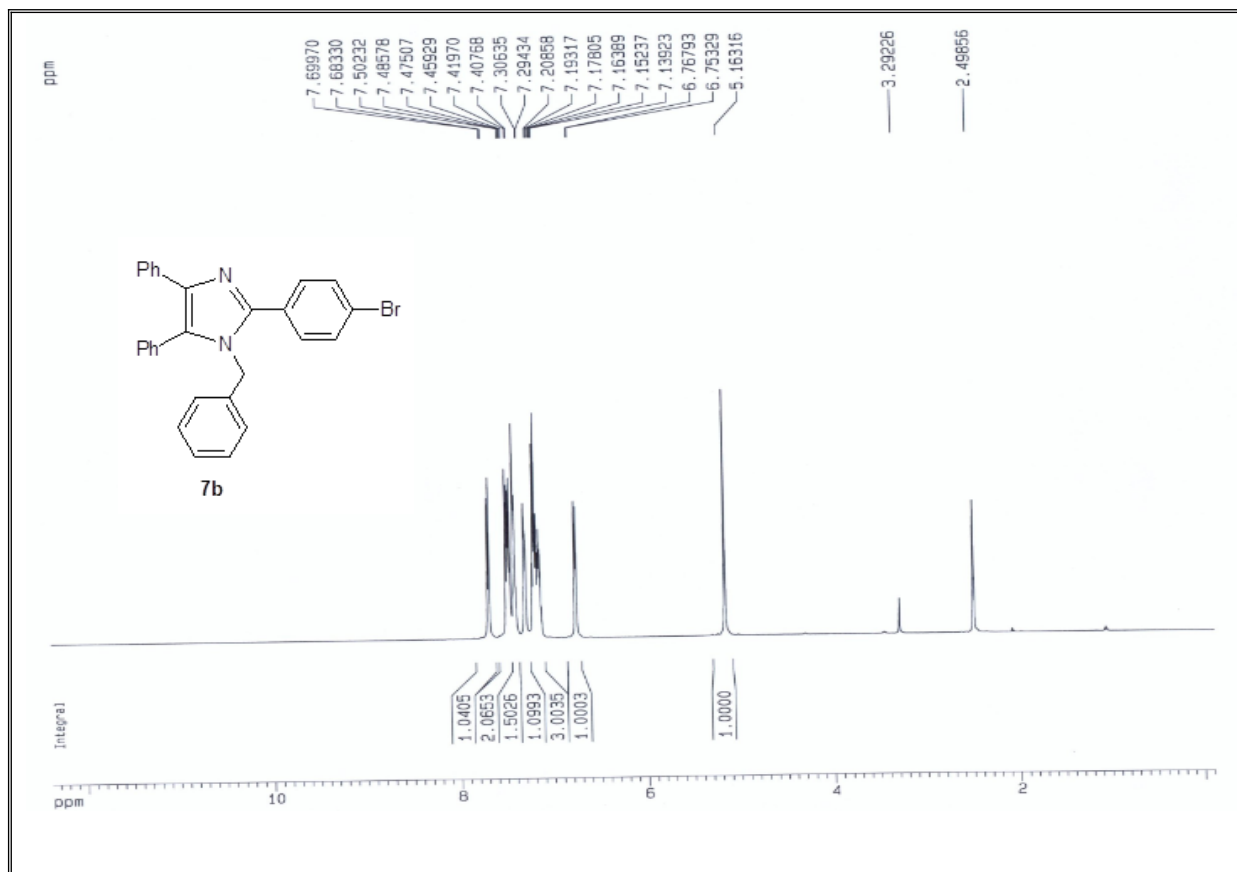

**Fig. S16.** <sup>1</sup>H NMR (DMSO-d<sub>6</sub>, 300 MHz) of **7b**

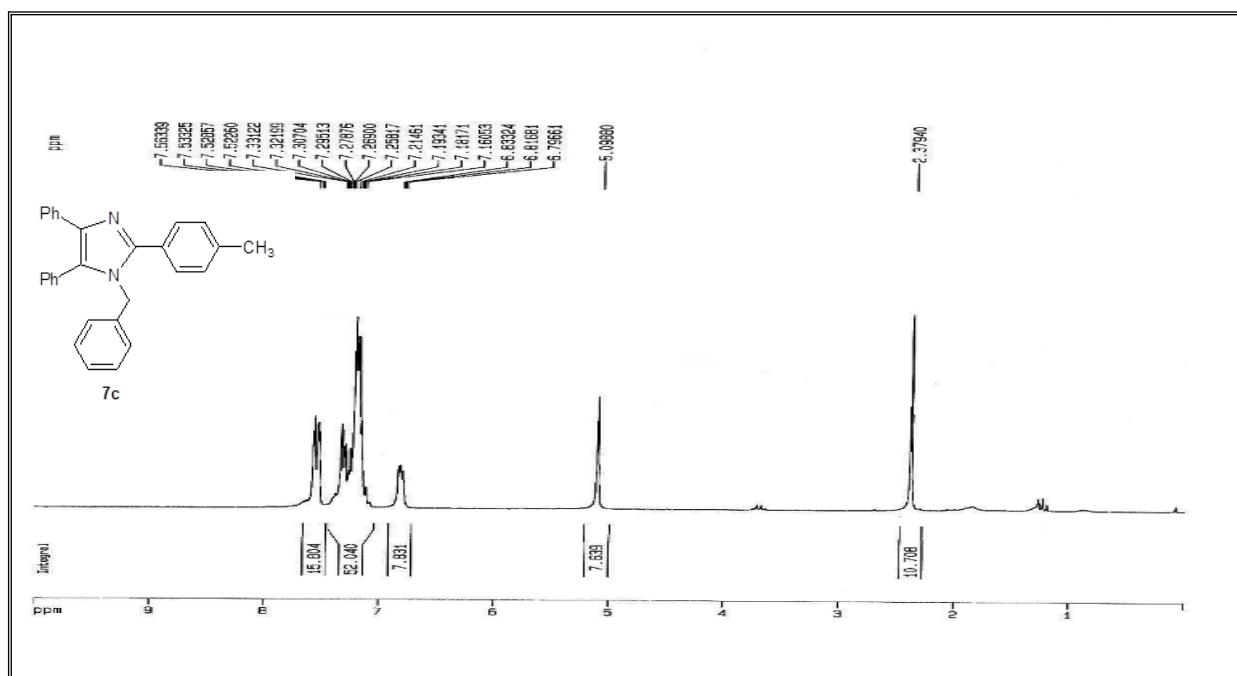

**Fig. S17.** <sup>1</sup>H NMR (CDCl<sub>3</sub>, 300 MHz) of **7c**

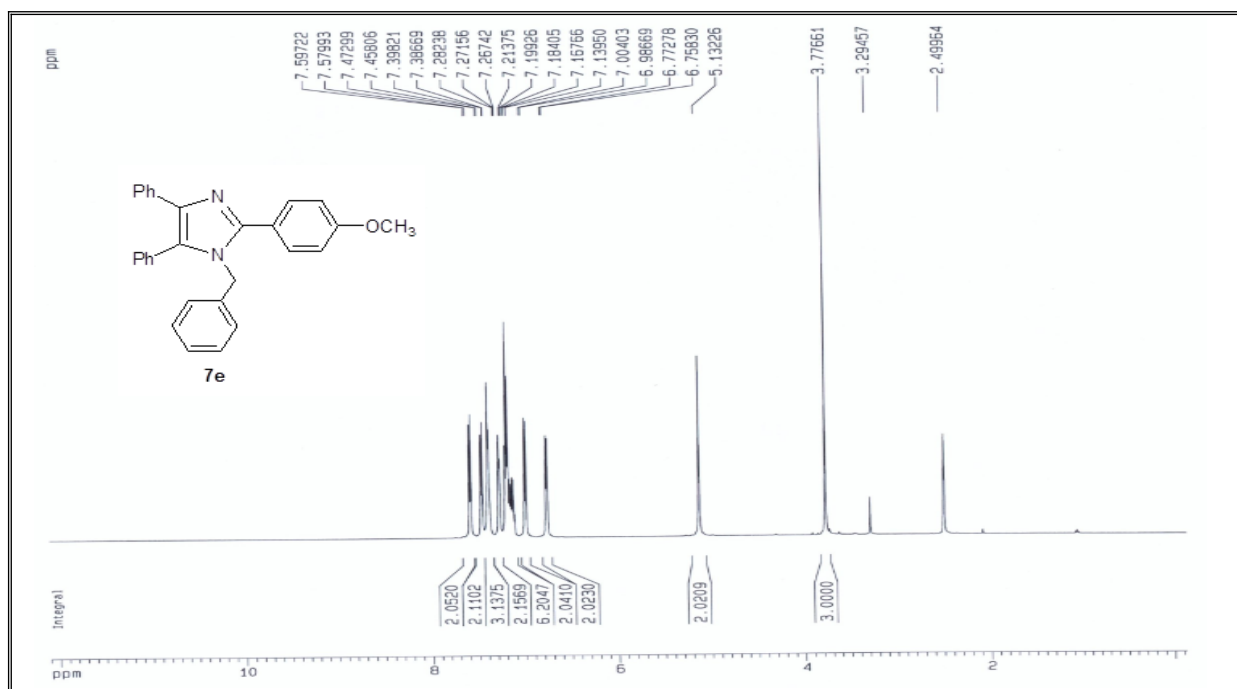

**Fig. S18.** <sup>1</sup>H NMR (DMSO-d<sub>6</sub>, 300 MHz) of **7e**

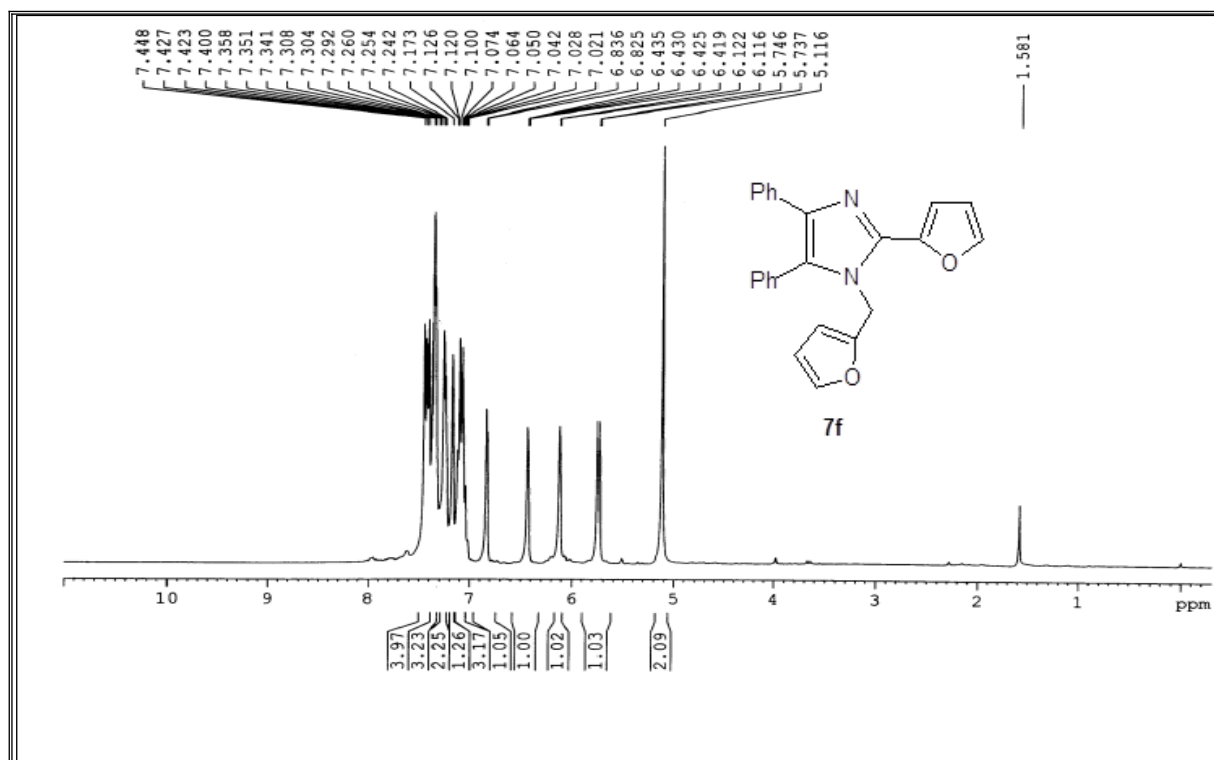

**Fig. S19.** <sup>1</sup>H NMR (CDCl<sub>3</sub>, 300 MHz) of **7f**

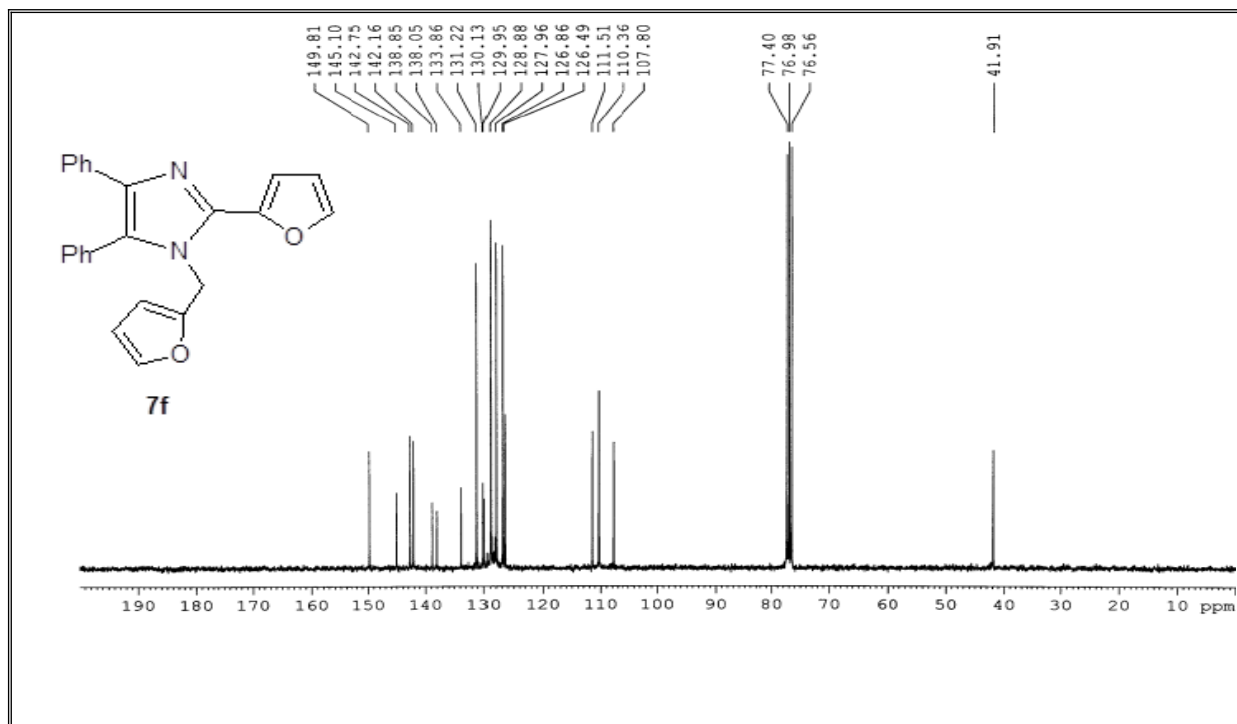

**Fig. S20.** <sup>13</sup>CNMR (CDCl<sub>3</sub>, 75MHz) of **7f**

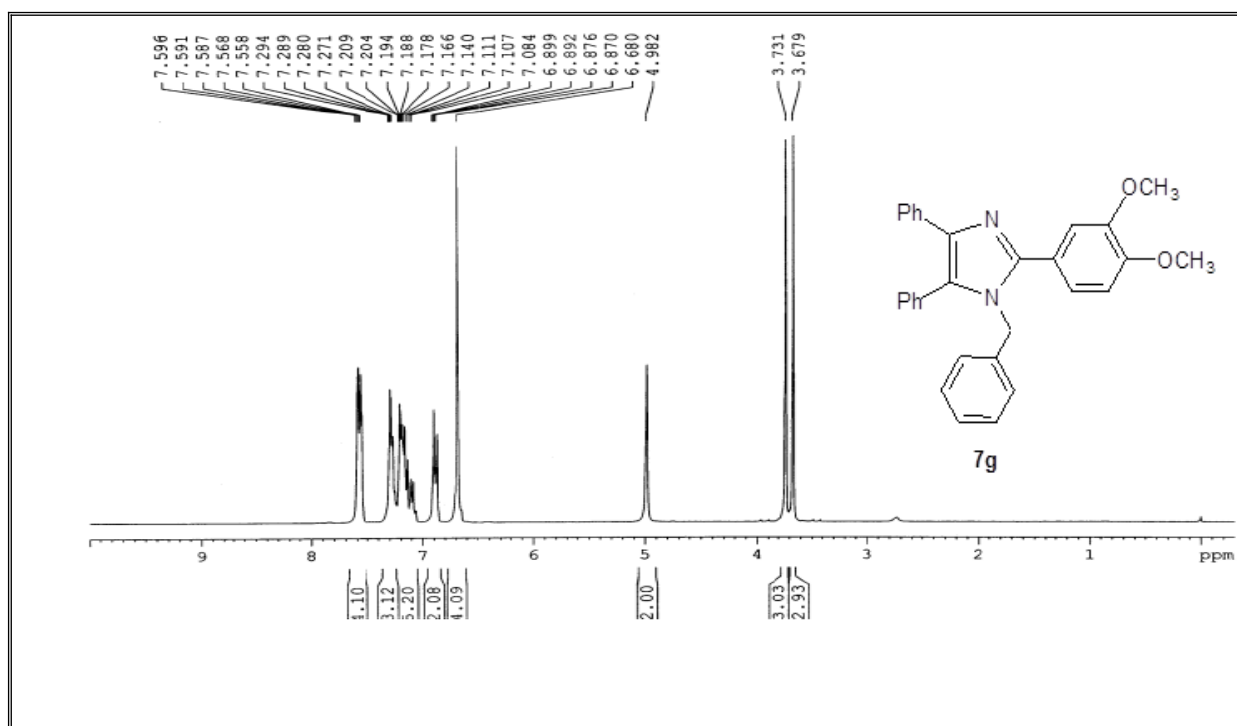

**Fig. S21.** <sup>1</sup>HNMR (CDCl<sub>3</sub>, 300 MHz) of **7g**

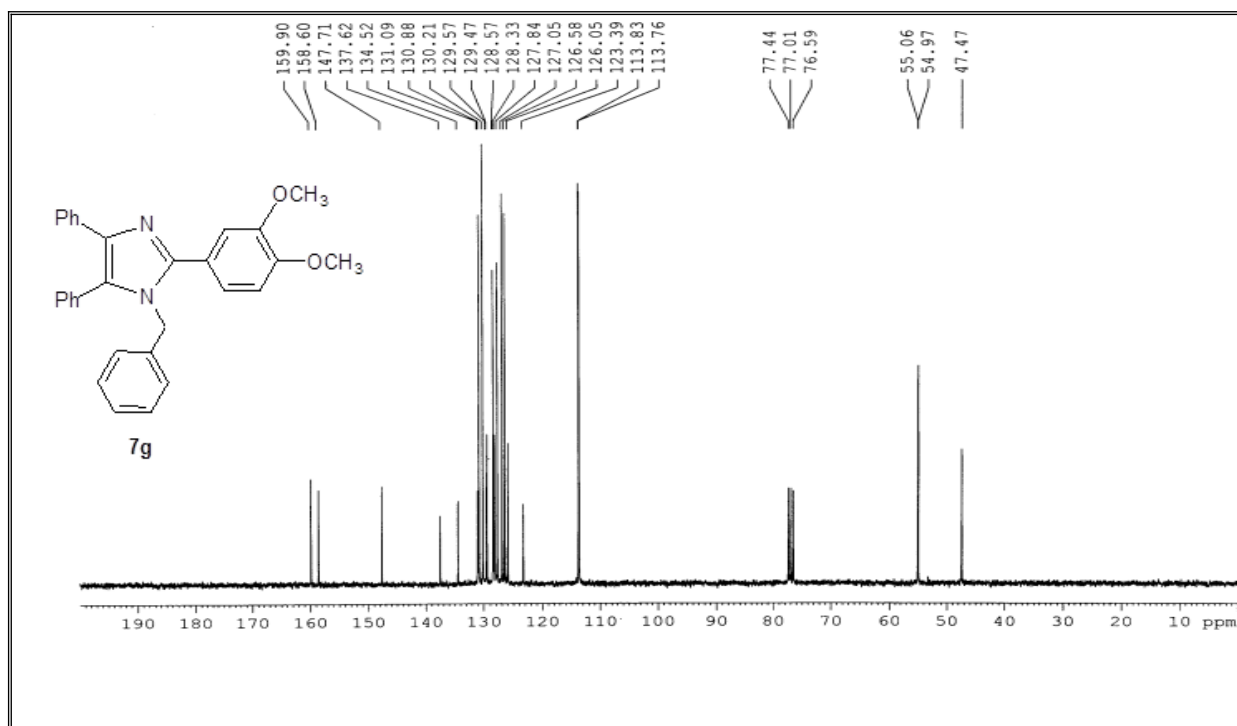

**Fig. S22.** <sup>13</sup>CNMR (CDCl<sub>3</sub>, 75MHz) of **7g**

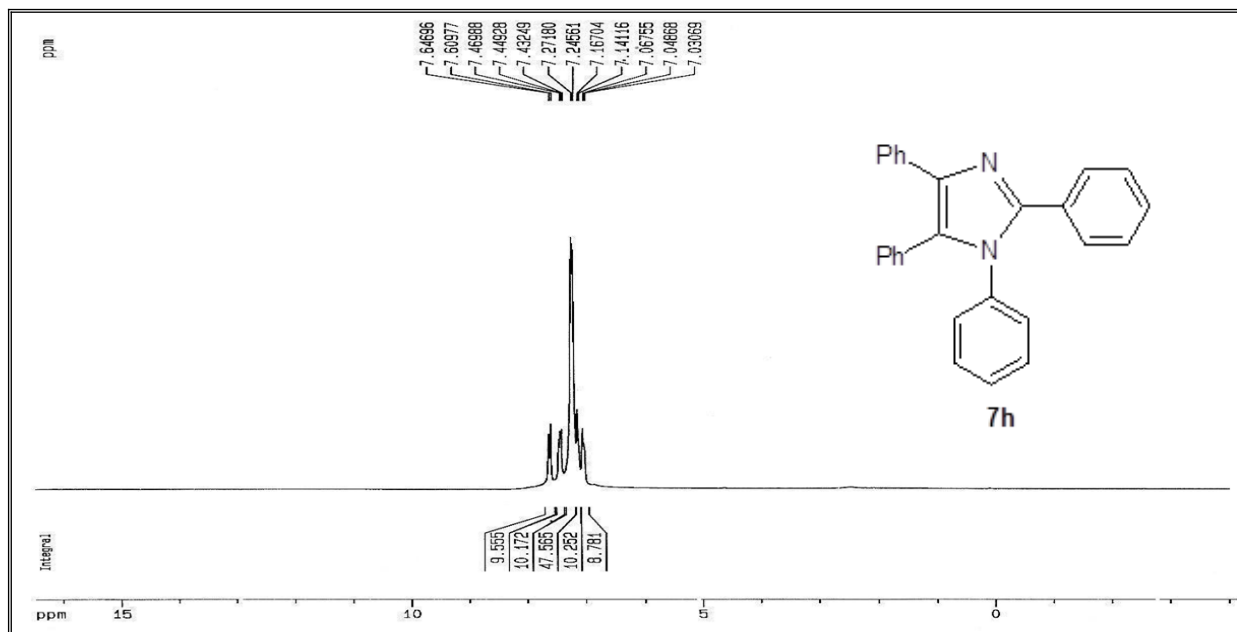

**Fig. S23.** <sup>1</sup>HNMR (CDCl<sub>3</sub>, 300 MHz) of **7h**

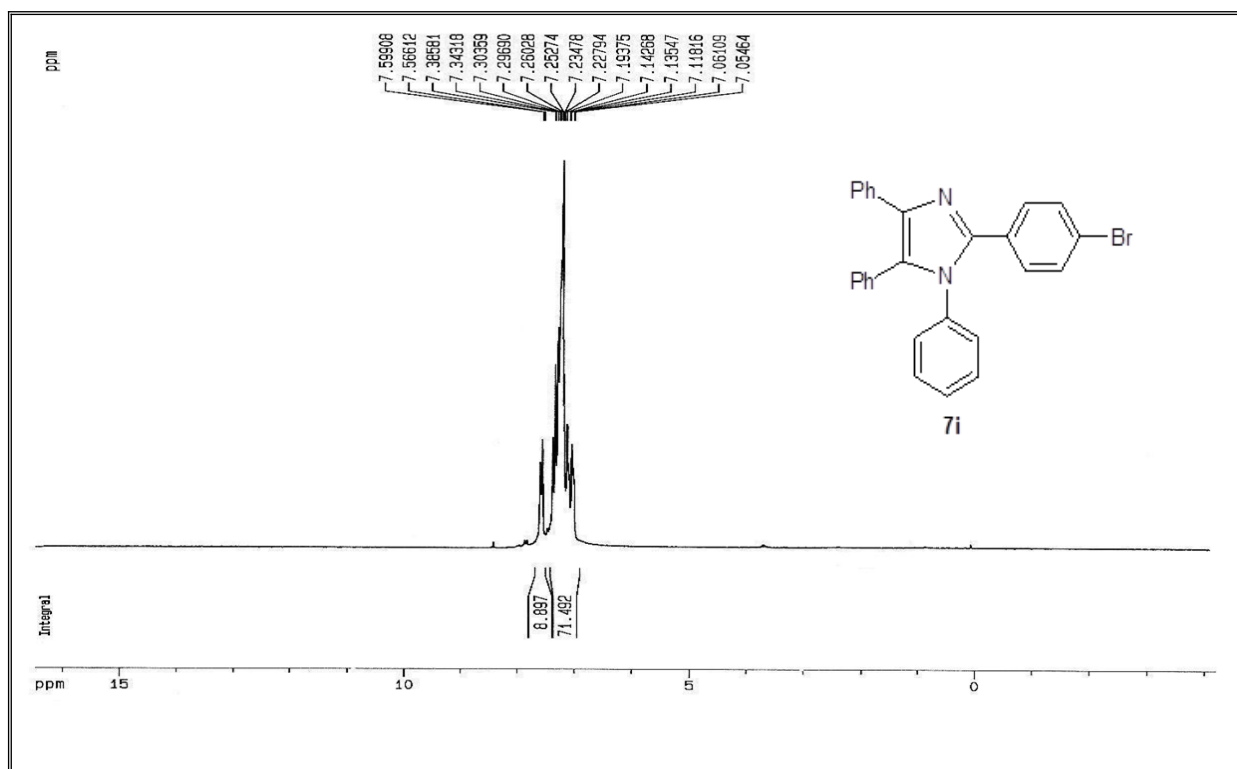

**Fig. S24.** <sup>1</sup>H NMR (CDCl<sub>3</sub>, 300 MHz) of **7i**

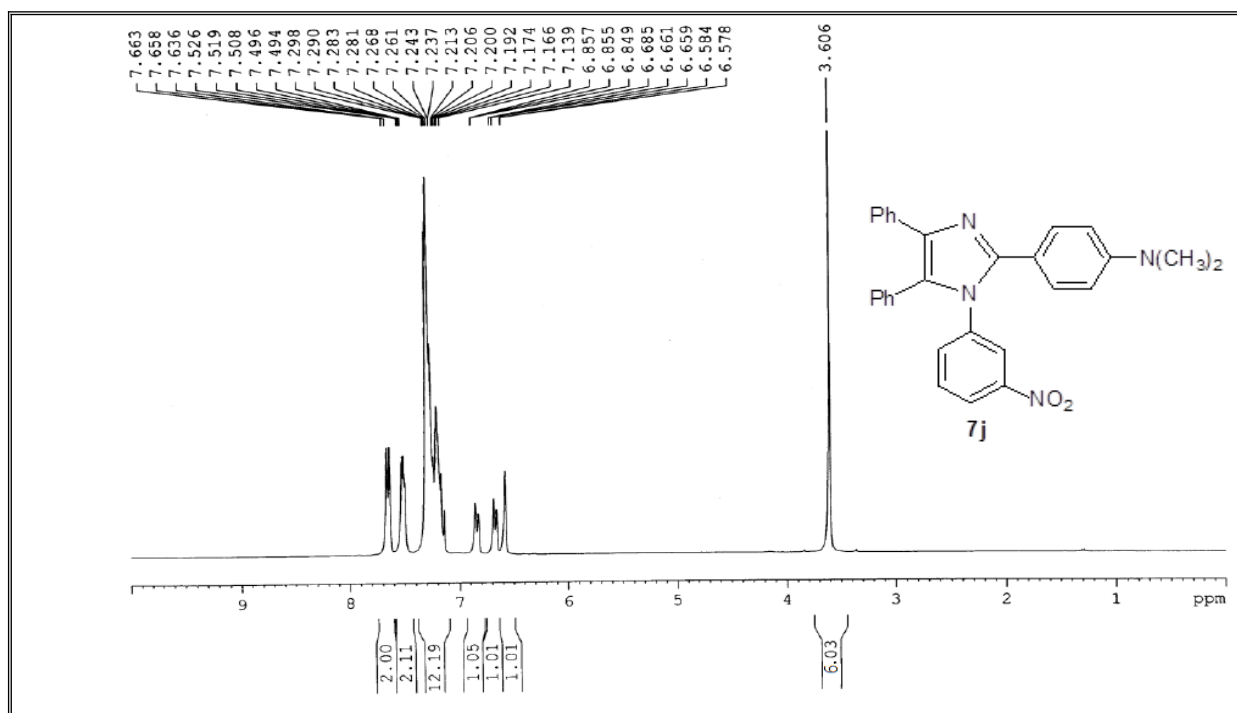

**Fig. S25.** <sup>1</sup>H NMR (CDCl<sub>3</sub>, 300 MHz) of **7j**
